# Supplementary material for: Converting H+ from coordinated water into H− enables super facile synthesis of LiBH4
Source: Royal Society of Chemistry journal article supplement (doi:10.1039/c9gc01897b), 2019-01-01
Supplement: c9gc01897b1.pdf [file c9gc01897b1.pdf]

Electronic Supplementary Information (ESI) for

**Converting H<sup>+</sup> from Coordinated Water into H<sup>-</sup> Enables Super Facile  
Synthesis of LiBH<sub>4</sub>**

Kang Chen<sup>a</sup>, Liuzhang Ouyang<sup>a,\*</sup>, Hao Zhong<sup>a</sup>, Jiangwen Liu<sup>a</sup>, Hui Wang<sup>a</sup>, Huaiyu  
Shao<sup>b,\*</sup>, Yao Zhang<sup>c</sup>, Min Zhu<sup>a,\*</sup>

*<sup>a</sup> School of Materials Science and Engineering, Guangdong Provincial Key  
Laboratory of Advanced Energy Storage Materials, South China University of  
Technology, Guangzhou, China.*

*<sup>b</sup> Joint Key Laboratory of the Ministry of Education, Institute of Applied Physics and  
Materials Engineering (IAPME), University of Macau, Macau SAR, China.*

*<sup>c</sup> School of Materials Science and Engineering, Jiangsu Key Laboratory of Advanced  
Metallic Materials, Southeast University, Nanjing, China.*

\*E-mail: [meouyang@scut.edu.cn](mailto:meouyang@scut.edu.cn) (L.Z. Ouyang)

\*E-mail: [memzhu@scut.edu.cn](mailto:memzhu@scut.edu.cn) (M. Zhu)

\*Email: [hshao@um.edu.mo](mailto:hshao@um.edu.mo) (H.Y. Shao)

## **List of Contents**

|          |                              |           |
|----------|------------------------------|-----------|
| <b>1</b> | <b>Supporting Methods</b>    | <b>3</b>  |
| <b>2</b> | <b>Supporting Figures</b>    | <b>7</b>  |
| <b>3</b> | <b>Supporting Table</b>      | <b>14</b> |
| <b>4</b> | <b>Supporting References</b> | <b>15</b> |

## 1 Supporting Methods

**Purification and quantification of lithium borohydride.**  $\text{LiBH}_4$  was extracted by as-distilled diethyl ether from the ball-milling mixtures. It is worth noting that both  $\text{MgO}$  and remaining reactants are insoluble in diethyl ether. The extracted solution and undissolved side-products were separated by polytetrafluoroethylene membrane (0.45  $\mu\text{m}$ ). Afterward, the colatuie was transferred into a new glass bottle and evaporated under sliding vane rotary vacuum pump, while the solvent vapor ( $\text{Et}_2\text{O}$ ) was captured by a cold trap placed in liquid nitrogen. Finally, the white solid powder ( $\text{LiBH}_4$ ) was obtained through the aforementioned procedures. The amount of formed  $\text{LiBH}_4$  was quantitatively determined by iodometric analysis<sup>1-2</sup> and the  $\text{LiBH}_4$  yield was calculated in accordance with the following equation:

$$\begin{aligned} \text{Yield} (\text{LiBH}_4) \\ = \frac{\text{obtained mass of LiBH}_4}{\text{theoretical mass of LiBH}_4} \times 100\% \end{aligned} \quad (1)$$

Notably, the  $\text{LiBH}_4$  yield is referred to as a ratio of the mass of  $\text{LiBH}_4$  actually converted by 1 mol of  $\text{LiBO}_2 \cdot 2\text{H}_2\text{O}$  to the theoretical value. In addition, to test the accuracy of the quantitative method, 52.0mg of commercial  $\text{LiBH}_4$  (95%), actually, 49.4mg of  $\text{LiBH}_4$  was mixed into 100 mL of  $\text{NaOH}$  solution (0.25 mol/L). There was 48.7mg of  $\text{LiBH}_4$  calculated by iodometric analysis. Then, the error of iodometric analysis was 1.4%, which was acceptable for quantification of  $\text{LiBH}_4$ . Moreover, 50.1mg of commercial  $\text{LiBH}_4$  (actually 47.6mg) was dissolved into 20 mL of as-distilled  $\text{Et}_2\text{O}$  and the extraction was evaporated via vacuum drying. There was 46.7mg of  $\text{LiBH}_4$  quantified by iodometric analysis. The error calculation was also below 2%.

**Ionic conductivity.** Since the discovery of superior  $\text{Li}^+$  conductivity in the HT (High temperature) phase,  $\text{LiBH}_4$  has attracted much attention as solid-state electrolytes (SSEs) with high compatibility with Li electrode, negligible electronic conduction, and low grain boundary resistance<sup>3</sup> compared to oxide-type or sulfide electrolyte systems<sup>4-5</sup>. However,  $\text{LiBH}_4$  acts as an electrical insulator with LT (low-temperature)  $\text{Li}^+$  conductivity  $< 10^{-7} \text{ S cm}^{-1}$ <sup>6</sup>, which falls short of the commercial demand ( $> 10^{-3} \text{ S cm}^{-1}$ ). As expected, the structural deformation by inducing defects and changing the atomic arrangement<sup>7-8</sup> could improve  $\text{Li}^+$  conductivity of  $\text{LiBH}_4$ . Especially, we succeeded in synthesizing  $\text{LiBH}_4 \cdot \text{NH}_3$  from the regenerated  $\text{LiBH}_4$  and the commercial one, respectively. Ionic conductivity of  $\text{LiBH}_4 \cdot \text{NH}_3$  was obtained according to the following procedures.

The powder samples were loaded into a stainless-steel mould with a diameter of 13 mm and pressed into pellets as solid electrolyte with thickness of  $\sim 1$  mm under a pressure of 20 MPa initially. Two metallic lithium foils of 13.5 mm diameter were then placed on the two sides of pellets to form test electrodes, and loaded in an airtight sample holder. All preparations took place in a glove box (Mikrouna, China) filled with Ar gas. Afterward, the ionic conductivity of pellets was measured by alternating current (AC) impedance spectroscopy in a frequency range from 1 Hz to 1 MHz with an electrochemical workstation (Gamry Interface 1000 and CHI604C, Chenghua, Shanghai). The airtight sample holder was placed in an oil bath and held for 30 min to control the temperature. Testing temperatures were ramped from room temperature (28 °C) to 45 °C. In addition,  $\text{LiBH}_4 \cdot \text{NH}_3$  was prepared by exposing the as-purified  $\text{LiBH}_4$

or commercial  $\text{LiBH}_4$  to an atmosphere of high-purity ammonia (99.999%) with 1 bar pressure at room temperature for 2 h and evacuated by sliding vane rotary vacuum pump for 3 h<sup>9-10</sup>.

The XRD patterns of  $\text{LiBH}_4 \cdot \text{NH}_3$  from as-purified product and commercial product are shown in **Fig. S6a**, which shows a good agreement with other's report<sup>8</sup>. The lithium-ionic conductivity was tested using two pieces of lithium foil electrodes in the typical Nyquist plots. **Fig. S7** shows partial of impedance plots of  $\text{LiBH}_4 \cdot \text{NH}_3$  acquired from the as-purified  $\text{LiBH}_4$ , as well as the commercial one at different temperatures. The resistance R concerned about ionic conductivity could be obtained from the intersection of a single arc or semi-circle with the  $Z'$  axis in the low-frequency limit from the Nyquist plots<sup>11-12</sup>. Therefore, the conductivity  $\sigma$  in accordance with following equation<sup>13-14</sup>:

$$\sigma = \frac{d}{AR} \quad (2)$$

wherein,  $\sigma$ , A, d, and R correspond to the conductivity, area of pellet, thickness and resistance of electrolytes, respectively. Nevertheless,  $\text{LiBH}_4$  acts as an electrical insulator with LT  $\text{Li}^+$  conductivity  $< 10^{-7} \text{ S cm}^{-1}$ , which is far from meeting the commercial demand ( $> 10^{-3} \text{ S cm}^{-1}$ ).  $\text{NH}_3$  was introduced to increase the defects and change the atomic arrangement of  $\text{LiBH}_4$ -based crystal structure, for improving its LT  $\text{Li}^+$  conductivity.

The Arrhenius plots of lithium borohydride mono-ammoniate ( $\text{LiBH}_4 \cdot \text{NH}_3$ ) are shown in **Fig. S6b**, it is found that  $\text{LiBH}_4 \cdot \text{NH}_3$  obtained from the as-purified  $\text{LiBH}_4$

exhibits similar conductivity increasing with the ramping temperature as the commercial one and shows higher conductivity of up to  $1.20 \times 10^{-3} \text{ S cm}^{-1}$  near room temperature (43 °C), higher than that of  $\text{LiBH}_4$  ( $10^{-7} \text{ S cm}^{-1}$ ) by 4 orders of magnitude<sup>6, 15</sup>. It should be noted that a drastic increase in ionic conductivity occurs around 37 °C due to the structural change resulting from the formation of Schottky defects when ammonia is desorbed and it brings position vacancy<sup>8</sup>. This is the reason why the conductivity in cooling process is better than that in heating process.

## 2 Supporting Figures

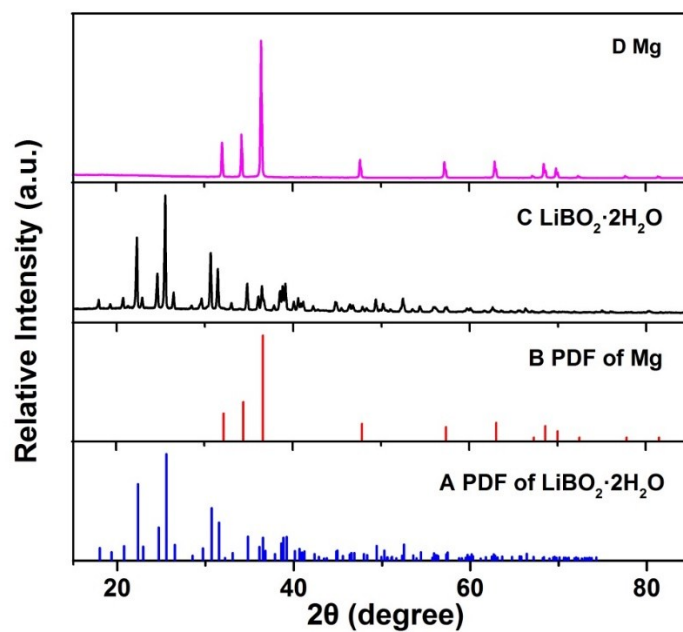

**Fig. S1** XRD patterns of raw materials. (A) PDF card of  $\text{LiBO}_2 \cdot 2\text{H}_2\text{O}$  (JCPDS 01-074-1509), (B) PDF card of Mg (JCPDS 00-035-08), (C) As-prepared  $\text{LiBO}_2 \cdot 2\text{H}_2\text{O}$  from  $\text{LiBO}_2$  aqueous solution, and (D) Pristine Mg.

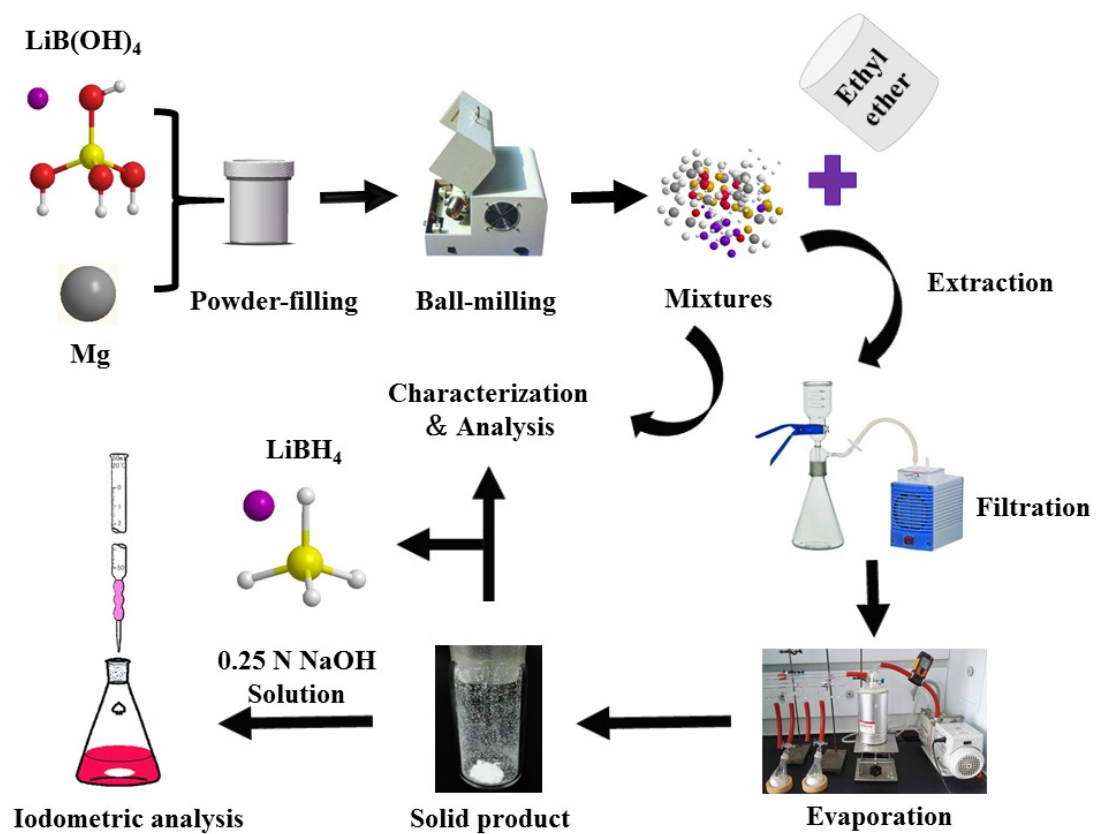

**Fig. S2** Schematic flow of the experimental procedures.



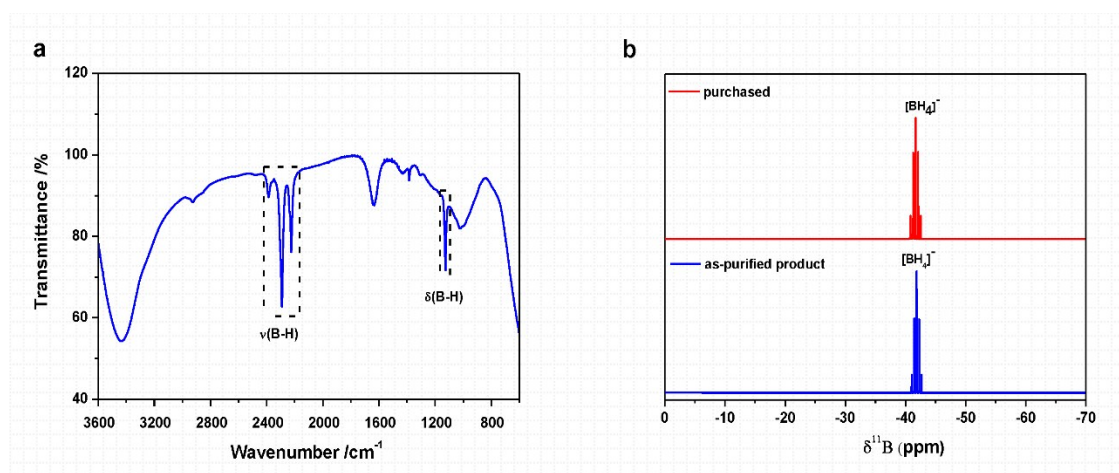

**Fig. S3** FT-IR and NMR measurements. a, FT-IR spectrum of the product after ball-milling Mg and LiBO<sub>2</sub>·2H<sub>2</sub>O mixtures (in 5.0:1 mole ratio) for 15h. b, Solution-state (Tetrahydrofuran-d<sub>8</sub>) <sup>11</sup>B (<sup>1</sup>H coupled) NMR spectra of commercial LiBH<sub>4</sub> and purified product.

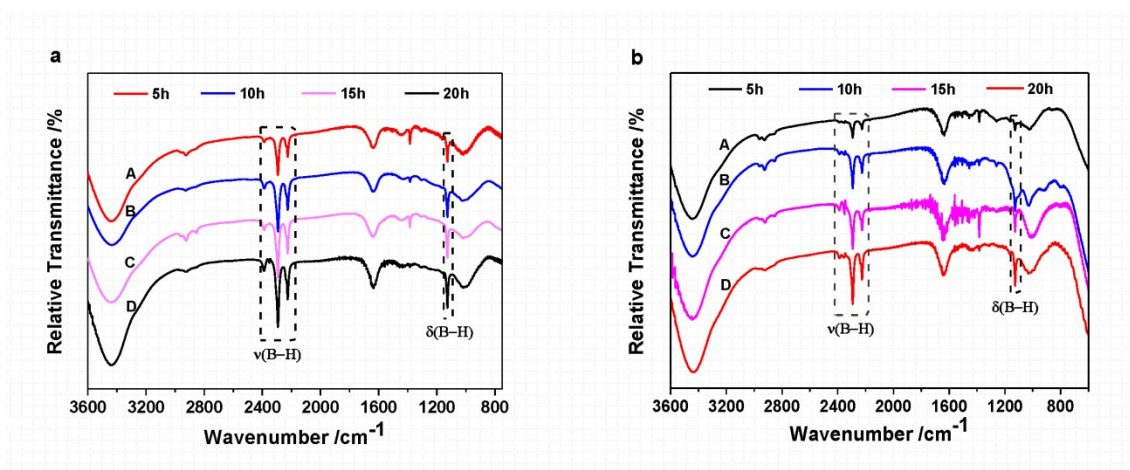

**Fig. S4** FT-IR spectra. a, FT-IR spectroscopy of Mg and  $\text{LiBO}_2 \cdot 2\text{H}_2\text{O}$  mixtures (in 5.0:1 mole ratio) after ball-milling for different durations: (A) 5h, (B) 10h, (C) 15h, and (D) 20h. b, FT-IR spectra of Mg and  $\text{LiBO}_2 \cdot 2\text{H}_2\text{O}$  mixtures (in 5.5:1 mole ratio) under same condition: (A) 5h, (B) 10h, (C) 15h, and (D) 20h.

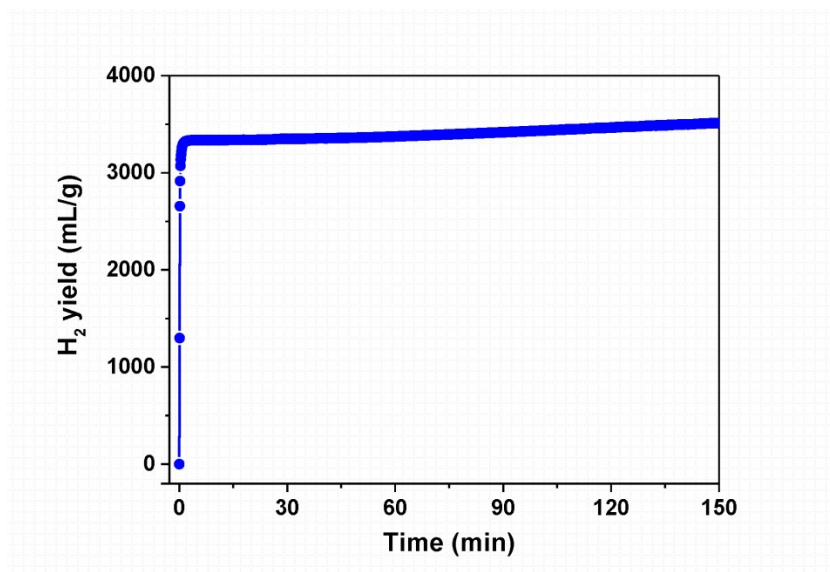

**Fig. S5** Hydrolysis curve of the regenerated  $\text{LiBH}_4$  in 2 wt.%  $\text{CoCl}_2$  aqueous solution with a molar ratio of  $\text{H}_2\text{O}/\text{LiBH}_4 = 4$ . The hydrogen yield of the as-purified product is  $3294 \text{ mL g}^{-1}$  in 60s, then followed by a sluggish kinetics.

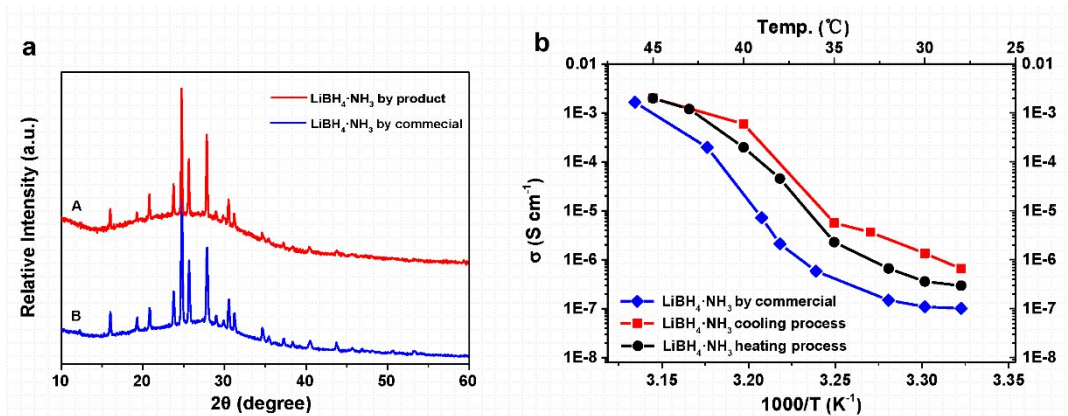

**Fig. S6** Ionic conductivity tests. a, The XRD patterns of LiBH<sub>4</sub>·NH<sub>3</sub> from (A) as-purified product and (B) commercial LiBH<sub>4</sub>. b, Arrhenius plots of the ionic conductivities for LiBH<sub>4</sub>·NH<sub>3</sub> obtained by as-purified LiBH<sub>4</sub> in heating process (black), cooling process (red), and LiBH<sub>4</sub>·NH<sub>3</sub> by commercial product (blue) at different temperatures.

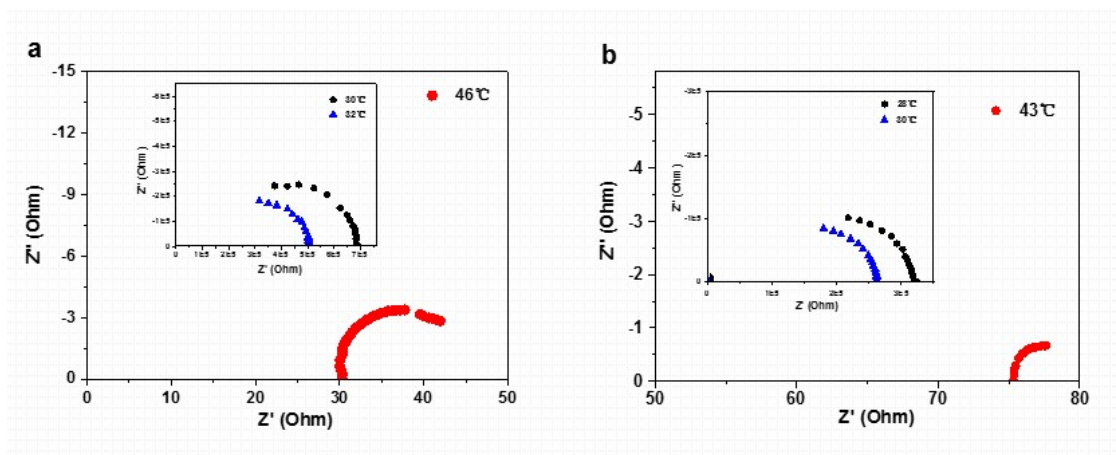

**Fig. S7** Typical Nyquist plots of impedance data obtained using a lithium-metal electrode. a,  $\text{LiBH}_4 \cdot \text{NH}_3$  from commercial  $\text{LiBH}_4$  under different temperatures. b,  $\text{LiBH}_4 \cdot \text{NH}_3$  from as-purified  $\text{LiBH}_4$  in heating process under varied temperatures.

### 3 Supporting Table

**Table S1.** Material cost of LiBH<sub>4</sub> produced by ball milling Mg and LiBO<sub>2</sub>·2H<sub>2</sub>O and commercial method.

| Method                                                   | Cost (US \$/ ton)   |
|----------------------------------------------------------|---------------------|
| Ball milling Mg and LiBO <sub>2</sub> ·2H <sub>2</sub> O | 34670 <sup>a</sup>  |
| Commercial method                                        | 171818 <sup>b</sup> |

<sup>a</sup>The calculation is based on the yield of 38.7% LiBH<sub>4</sub> when Mg and LiBO<sub>2</sub>·2H<sub>2</sub>O mixture with a ratio of 5.0:1 is ball milled for 20h. Then 14.41 tons of Mg are required to produce 1 ton LiBH<sub>4</sub>. The price of Mg is \$2406/ton, which is available from China nonferrous metal network <sup>[16]</sup>. Then the total cost of raw materials is \$34670/ton.

<sup>b</sup>The price is from a commercial company in China. Commercial method refers to wet

chemical reaction method <sup>[17-18]</sup>: NaBH<sub>4</sub> + LiCl  $\xrightarrow[75\%]{\textit{isopropylamine}}$  LiBH<sub>4</sub> + NaCl.

According to a yield of 75% in current industrial production, 2.59 tons of LiCl and 2.32 tons of NaBH<sub>4</sub> are needed for production of 1 ton LiBH<sub>4</sub>. Then the total cost of raw materials is \$171818 due to the prices of LiCl and NaBH<sub>4</sub> being \$25769/ton and \$45291/ton, respectively <sup>[19]</sup>.

## 4 Supporting References

1. Lyttle DA, Jensen EH, Struck WA. *Anal. Chem.* 1952, **24(11)**, 1843-1844.
2. C. L. Hsueh, C. H. Liu, B. H. Chen, C. Y. Chen, Y. C. Kuo, K. J. Hwang, J. R. Ku. *Int. J. Hydrogen Energy* 2009, **34(4)**, 1717-1725.
3. Y. Yan, R.-S. Kühnel, A. Remhof, L. Duchêne, E. C. Reyes, D. Rentsch, Z. Łodziana, C. Battaglia. *Adv. Energy Mater.* 2017, **7(19)**, 1700294.
4. K. Takada. *Acta Mater.* 2013, *61(3)*, 759-770.
5. F. Mizuno, A. Hayashi, K. Tadanaga, M. Tatsumisago. *Adv. Mater.* 2005, **17(7)**, 918-921.
6. M. Matsuo, S.-i. Orimo. *Adv. Energy Mater.* 2011, **1(2)**, 161-172.
7. M. Matsuo, A. Remhof, P. Martelli, R. Caputo, M. Ernst, Y. Miura, T. Sato, H. Oguchi, H. Maekawa, H. Takamura, A. Borgschulte, A. Züttel, S.-i. Orimo. *J. Am. Chem. Soc.* 2009, **131(45)**, 16389-16391.
8. T. Zhang, Y. Wang, T. Song, H. Miyaoka, K. Shinzato, H. Miyaoka, T. Ichikawa, S. Shi, X. Zhang, S. Isobe, N. Hashimoto, Y. Kojima. *Joule* 2018, **2(8)**, 1522-1533.
9. Y. H. Guo, W. W. Sun, Z. P. Guo, H. K. Liu, D. L. Sun, X. B. Yu. *J. Phys. Chem. C* 2010, **114(29)**, 12823-12827.
10. S. Li, W. Sun, Z. Tang, Y. Guo, X. Yu. *Int. J. Hydrogen Energy* 2012, **37(4)**, 3328-3337.
11. M. Xiang, Y. Zhang, L. Zhan, Y. Zhu, X. Guo, J. Chen, Z. Wang, L. Li. *J. Alloys Compd.* 2017, *729(30)*, 936-941.
12. Y. Zhang, L. Zhan, X. Zhuang, Y. Zhu, N. Wan, X. Guo, J. Chen, Z. Wang, L. Li. *J. Alloys Compd.* 2017, **695(25)**, 2894-2901.
13. D. Sveinbjörnsson, J. S. G. Myrdal, D. Blanchard, J. J. Bentzen, T. Hirata, M. B. Mogensen, P.

- Norby, S.-I. Orimo, T. Vegge. *J. Phys. Chem. C* 2013, **117(7)**, 3249-3257.
14. D. Blanchard, A. Nale, D. Sveinbjörnsson, T. M. Eggenhuisen, M. H. W. Verkuijlen, Suwarno, T. Vegge, A. P. M. Kentgens, P. E. de Jongh. *Adv. Funct. Mater.* 2015, **25(2)**, 184-192.
15. T. Ikeshoji, E. Tsuchida, T. Morishita, K. Ikeda, M. Matsuo, Y. Kawazoe, S.-i. Orimo. *Phys. Rev. B* 2011, **83(14)**, 144301.
16. The price of Mg is available from: <http://www.cnmn.com.cn/>.
17. H. C. Brown, M. C. Yong, S. Narasimhan. *Inorg. Chem.* 1981, **20**, 4454-4456.
18. H. I. Schlesinger, H. C. Brown, B. Abraham, A. C. Bond. *J. Am. Chem. Soc.* 1953, **75**, 186-190.
19. Jinjinle chemical Co. LTD. for the price of LiCl and NaBH<sub>4</sub>. Available from: <https://show.guidechem.com/gaidexinjjl/>.
